# Supplementary material for: A RAF-SnRK2 kinase cascade mediates early osmotic stress signaling in higher plants
Source: PubMed Central journal article supplement (PMC6992735; doi:10.1038/s41467-020-14477-9), 2020-01-30
Supplement: 41467_2020_14477_MOESM3_ESM.pdf [file 41467_2020_14477_MOESM3_ESM.pdf]

## **Description of Additional Supplementary Files**

File Name: Supplementary Data 1

Description: The mannitol-perturbed phosphosites from Col-0 Arabidopsis.

File Name: Supplementary Data 2

Description: The mannitol-perturbed phosphosites from snrk2-dec mutant Arabidopsis.

File Name: Supplementary Data 3

Description: All the identified kinase phosphosites from Col-0 and snrk2-dec mutant Arabidopsis.

File Name: Supplementary Data 4

Description: The mannitol-induced kinase phosphosites from Col-0 Arabidopsis.

File Name: Supplementary Data 5

Description: The mannitol-induced kinase phosphosites from snrk2-dec mutant Arabidopsis.

File Name: Supplementary Data 6

Description: The <sup>18</sup>O labeled putative RAF target peptides in SnRK2.4 and SnRK2.6.

File Name: Supplementary Data 7

Description: Primers used in this study.
