# Supplementary material for: A RAF-SnRK2 kinase cascade mediates early osmotic stress signaling in higher plants
Source: Nat Commun. 2020 Jan 30;11:613. doi: 10.1038/s41467-020-14477-9 (PMC6992735; doi:10.1038/s41467-020-14477-9)
Supplement: Supplementary file 1 — Supplementary Information [file 41467_2020_14477_MOESM1_ESM.pdf]

# A RAF-SnRK2 kinase cascade mediates early osmotic stress signaling in higher plants

Lin et al.

Supplementary Information

## **This file includes:**

Supplementary Figure 1 to Figure 11 with figure legends and Supplementary Table 1.

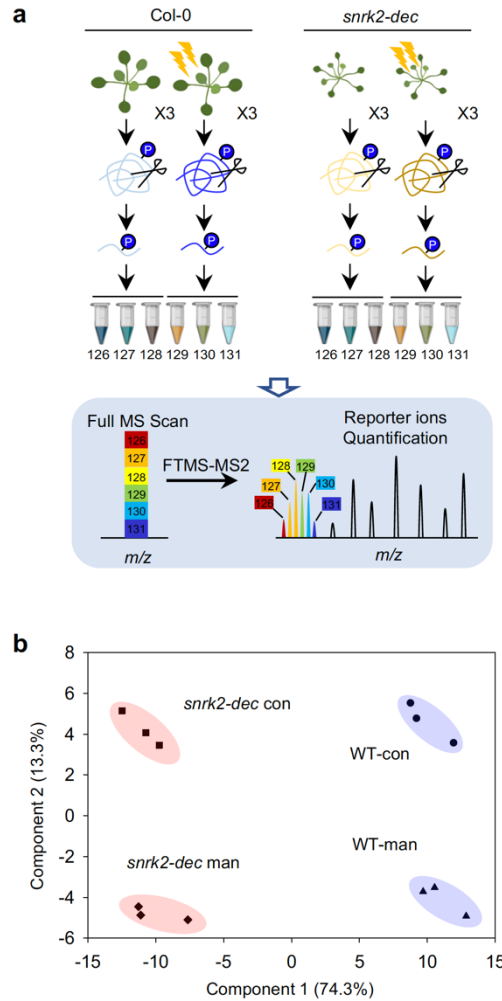

**Supplementary Fig. 1** Quantitative phosphoproteomics reveal the osmotic stress responsive phosphoproteomes. **a** TMT6-plex phosphoproteome analysis was used to identify the protein kinases that have increased phosphorylation after 30 min of mannitol treatment of wild type and *snrk2-dec* mutant plants in biological triplicates. Proteins were extracted, precipitated, and digested using Lys-C followed by trypsin. The phosphopeptides were labeled with TMT6-plex reagents, pooled, and enriched using an IMAC StageTip. The enriched phosphopeptides were fractionated by a basic pH reverse phase StageTip. The fractions were analyzed by FTMS-MS2. **b** PCA of the phosphorylation sites across all four samples representing distinct phosphoproteomic types for different samples and treatments (FDR < 0.05).

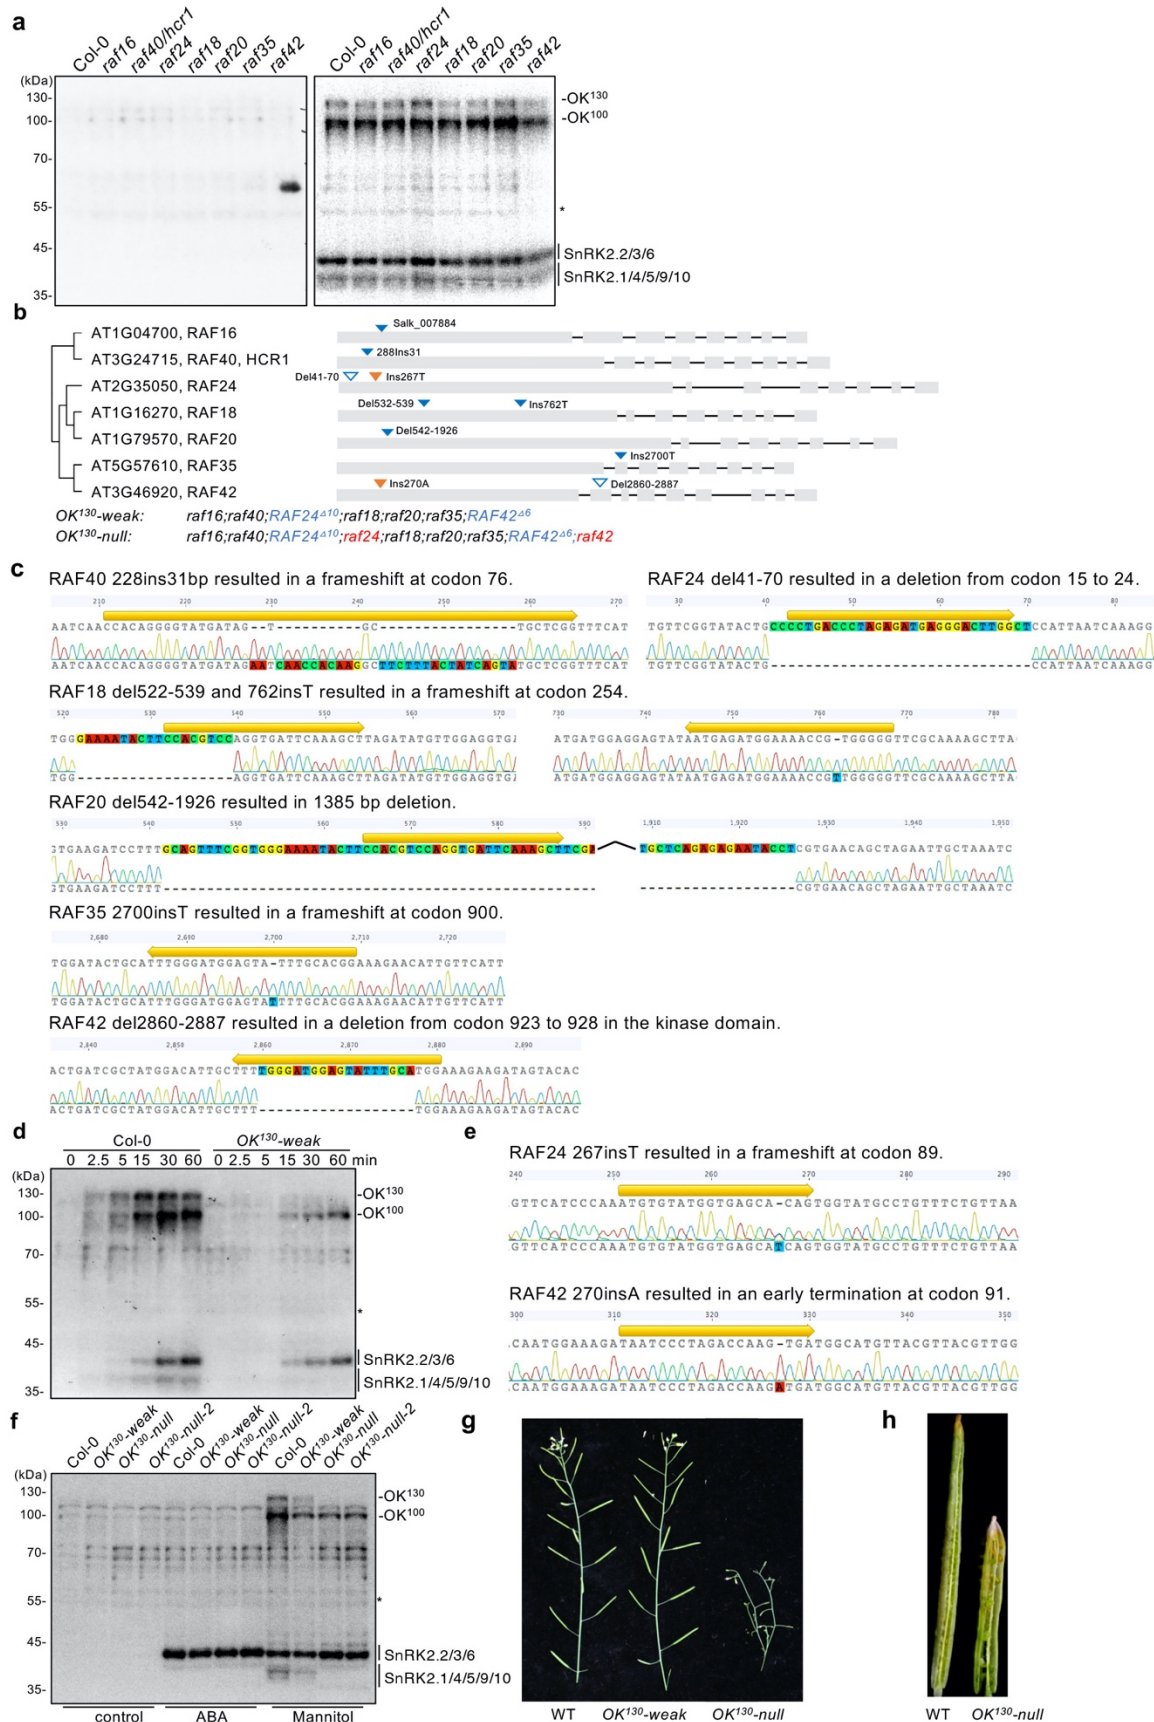

**Supplementary Fig. 2** Identification of OKs by biochemistry and genetics. **a** In-gel kinase assay showing the SnRK2, OK<sup>100</sup>, and OK<sup>130</sup> activities before (left panel) and after (right panel) mannitol treatments in wild type and single mutants of RAFs. Image is representative of two independent experiments. **b** Mutations of B4 group Raf-like kinase genes in *OK<sup>130</sup>-weak* and *OK<sup>130</sup>-null* alleles. The mutations in *OK<sup>130</sup>-weak* are indicated in blue, and additional mutations in *OK<sup>130</sup>-null* mutant are indicated in red. Ins, insertion. Del, deletion. **c** Sequencing results showing the mutations in *RAF*s in the *OK<sup>130</sup>-weak* mutant. **d** In-gel kinase assay showing the SnRK2, OK<sup>100</sup>, and OK<sup>130</sup> activities in the wild type and *OK<sup>130</sup>-weak* allele after the indicated time of mannitol treatment. Image is representative of two independent experiments. **e** Sequencing results showing the additional mutation in *RAF24* and *RAF42* in *OK<sup>130</sup>-null* mutant. **f** In-gel kinase assay showing the SnRK2, OK<sup>100</sup>, and OK<sup>130</sup> activities in the wild type, *OK<sup>130</sup>-weak*, *OK<sup>130</sup>-null*, and a second null allele of OK<sup>130</sup> (*OK<sup>130</sup>-null-2*) after 15 min ABA or mannitol treatment. Image is representative of two independent experiments. **g** Photographs of inflorescences from the wild type, *OK<sup>130</sup>-weak*, and *OK<sup>130</sup>-null*. **h** Photographs of silique from wild type and *OK<sup>130</sup>-null* allele. Source data are provided as Source Data file.

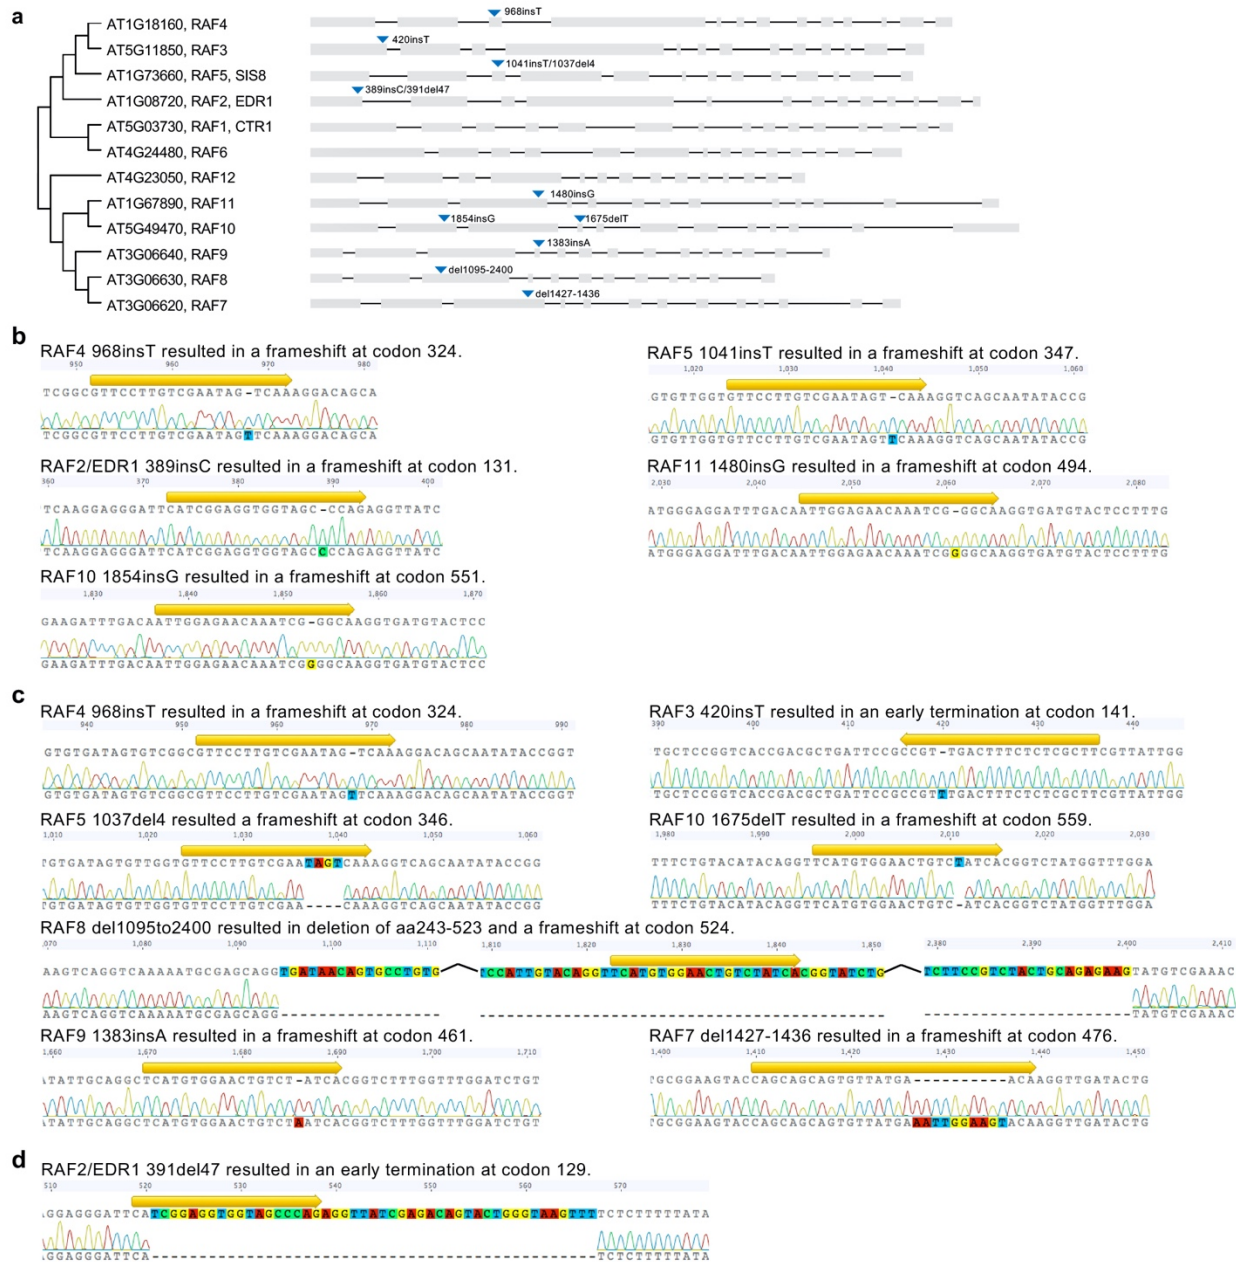

**Supplementary Fig. 3** Screening of B2 and B3 RAF high-order mutants. **a** Mutations of RAF genes in the high-order mutants. The mutations are indicated by blue arrows. Ins, insertion. Del, deletion. **b** Sequencing results showing the mutations in *RAF2/EDR1*, *RAF4*, *RAF5*, *RAF10*, and *RAF11* in the *OK<sup>100</sup>-quin* mutant. **c** Sequencing results showing the mutations in *RAF3*, *RAF4*, *RAF5*, *RAF7*, *RAF8*, *RAF9*, and *RAF10* in the *OK-quatdec* mutant. **d** Sequencing results showing an additional mutation in *RAF2/EDR1* in the *OK-quindec* mutant.

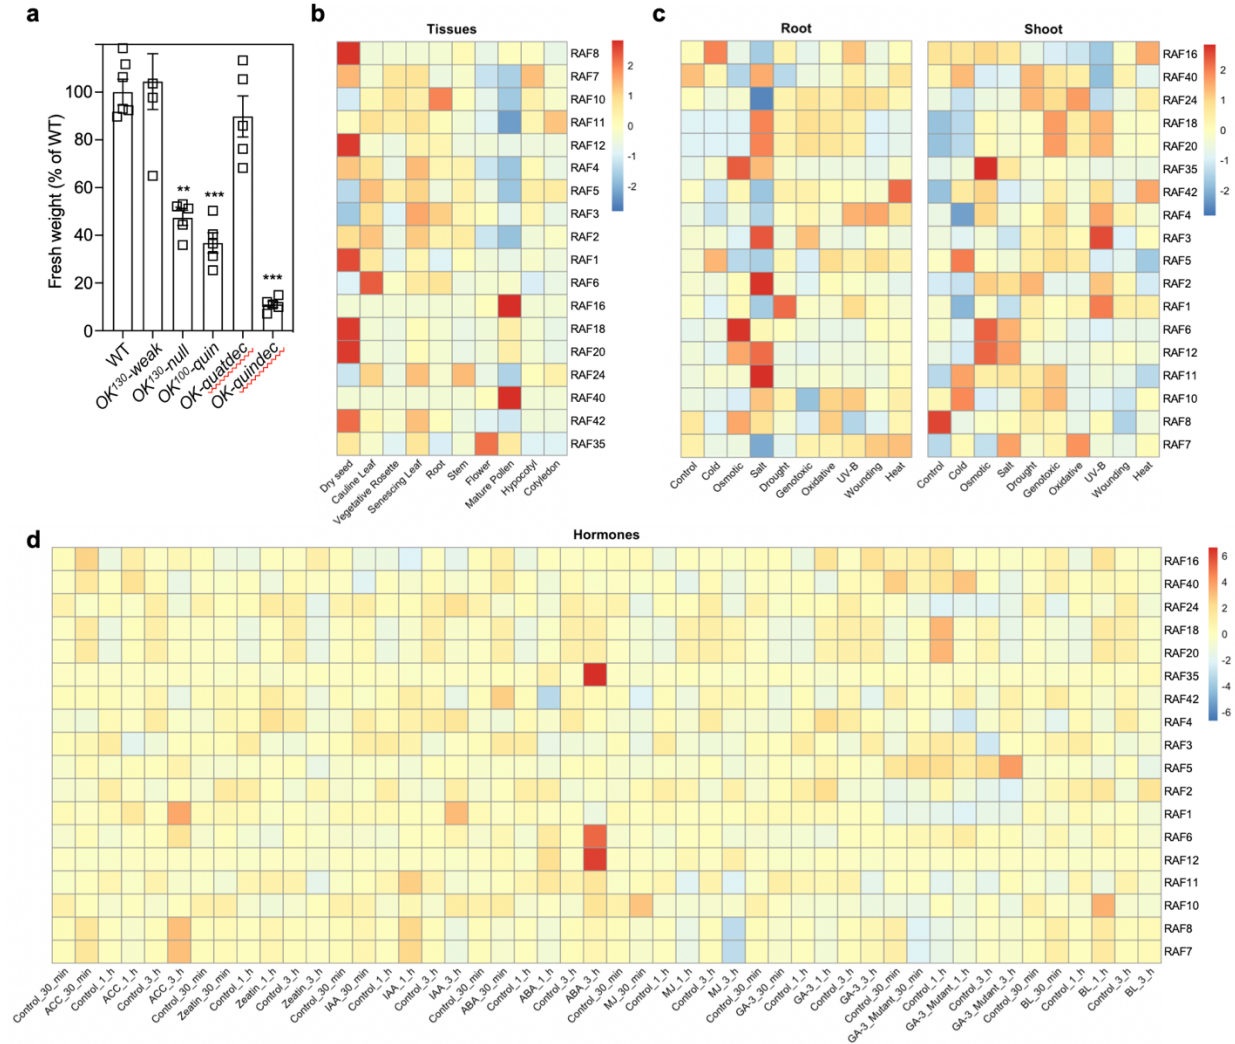

**Supplementary Fig. 4** Expression pattern and localization of RAFs. **a** The fresh weight of seedlings after 4 weeks of growth in the soil. Error bars, SEM (n = 5). Two-tailed paired *t*-tests, \*\*,  $p < 0.01$ , \*\*\*,  $p < 0.001$ . **b** Heat map showing relative abundance of *RAF* transcripts in different tissues. **c** Heat map showing relative abundance of *RAF* transcripts upon different stress treatments in root (left panel) or shoot (right panel). **d** Heat map showing relative abundance of *RAF* transcripts in control and hormone-treated seedlings. The expression of *RAF*s were obtained from the Arabidopsis eFP browser web site <http://bar.utoronto.ca/efp/cgi-bin/efpWeb.cgi>. Source data are provided as Source Data file.

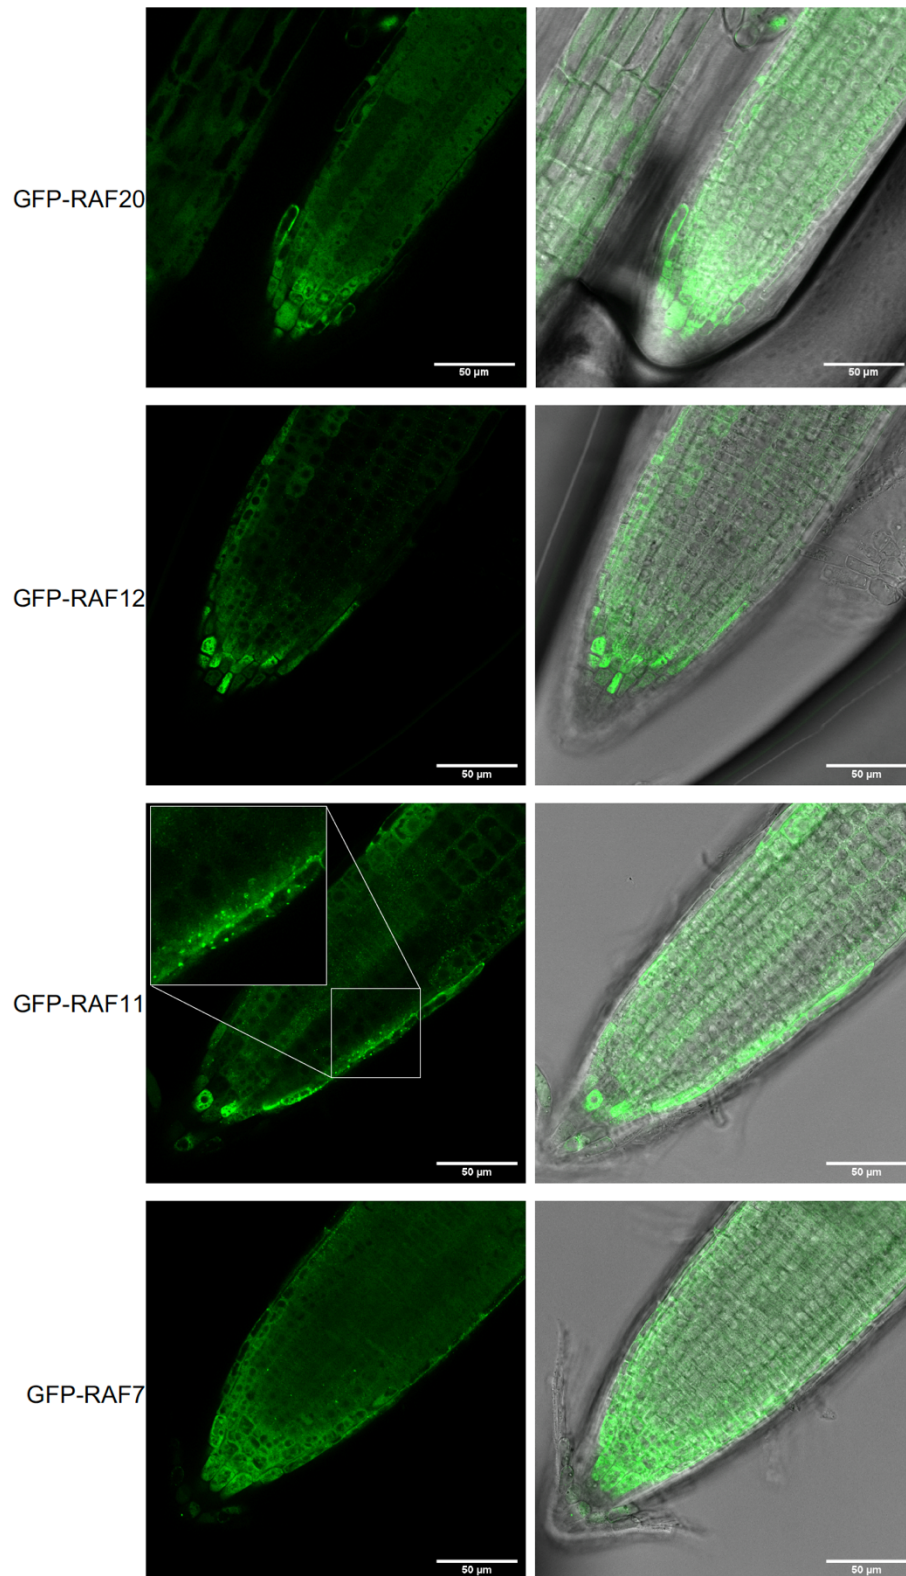

**Supplementary Fig. 5** Subcellular localization of RAFs. GFP fluorescence showing the subcellular localization of GFP-RAF20, GFP-RAF12, GFP-RAF11, GFP-RAF7 in the *p35S-GFP-RAF* fusion transgenic plants.

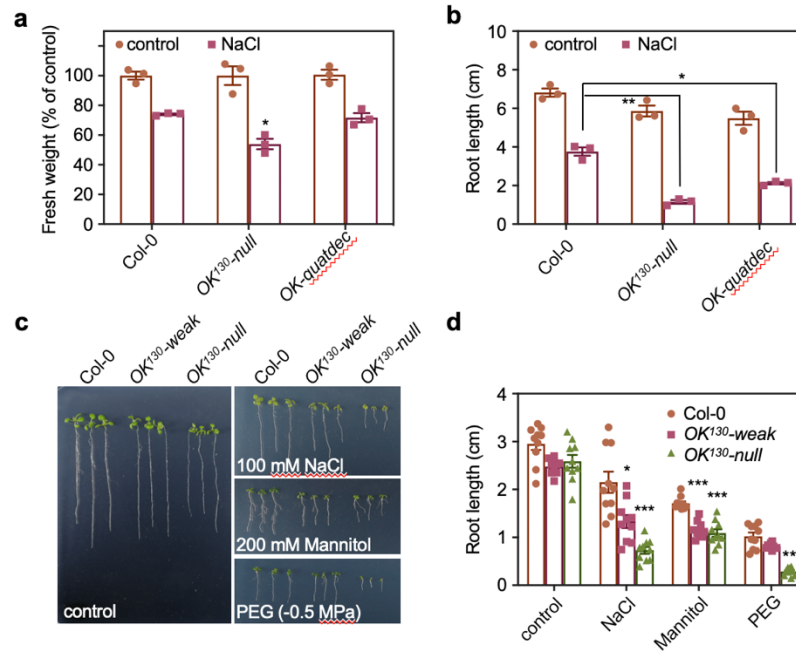

**Supplementary Fig. 6** RAF high-order mutants hypersensitive to osmotic stresses. **a** The fresh weight of seedlings 7 days after transfer to and growth on medium containing 100 mM NaCl. Error bars, SEM (n = 3). Two-tailed paired *t*-tests, \*,  $p = 0.037$ . **b** The root length of seedlings 7 days after transfer to and growth on medium containing 100 mM NaCl. Error bars, SEM (n = 3). Two-tailed paired *t*-tests, \*  $p = 0.025$ , \*\*  $p = 0.002$ . **c** Photographs of seedlings after 7 days of germination and growth on 1/2 MS medium containing NaCl, mannitol, or PEG. **d** The root length of seedlings after 7 days of germination and growth on 1/2 MS medium containing NaCl, mannitol, or PEG. Error bars, SEM (n = 11). Two-tailed paired *t*-tests, \*  $p = 0.033$ , \*\*\*,  $p < 0.001$ . Source data are provided as Source Data file.

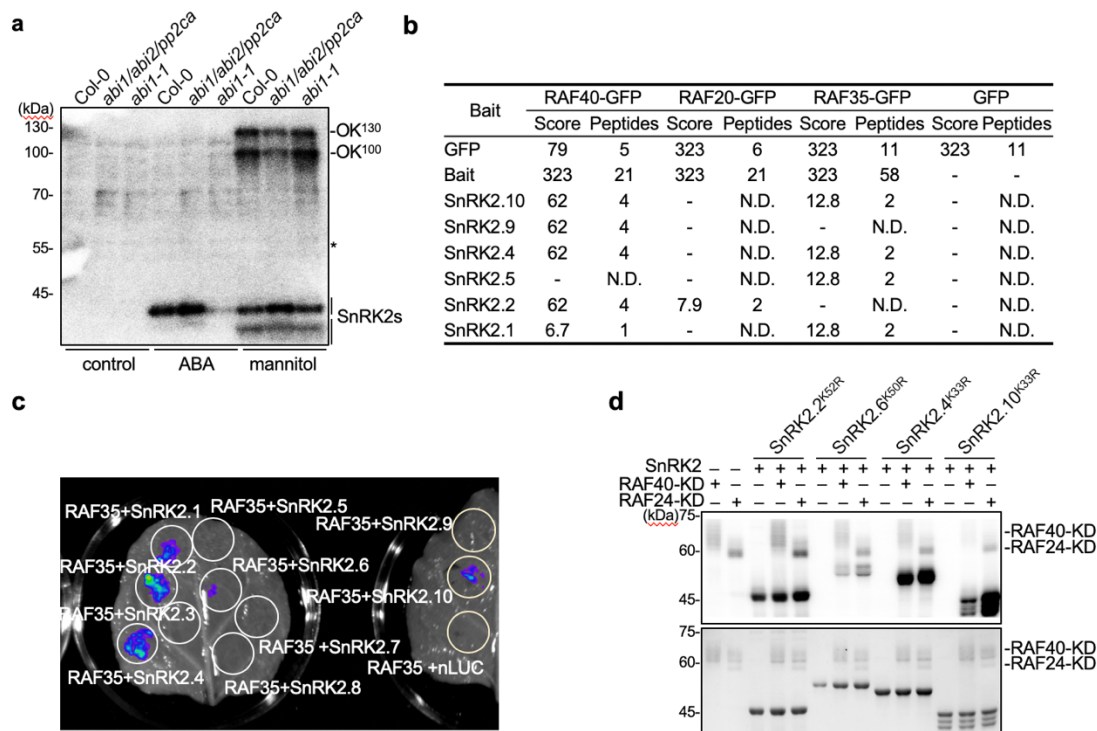

**Supplementary Fig. 7** RAFs interact with and phosphorylate SnRK2s. **a** In-gel kinase assay showing the SnRK2, OK<sup>100</sup>, and OK<sup>130</sup> activities after ABA or mannitol treatments in wild type, *abi1/abi2/pp2ca*, and *abi1-1* mutants. Image is representative of two independent experiments. **b** Immunoprecipitation-mass spectrometry (IP-MS) result showing peptides from SnRK2s that co-immunoprecipitated with GFP-RAF40, GFP-RAF20, or GFP-RAF35, but not with empty GFP. **c** RAF35 interacts with SnRK2s in split LUC complementation assay in *Nicotiana benthamiana* leaves. The RAF35-cLUC and nLUC combination was used as a negative control. **d** RAF40-KD and RAF24-KD phosphorylates SnRK2s *in vitro*. Recombinant RAF40-KD and RAF24-KD were used to phosphorylate recombinant SnRK2s in the presence of [ $\gamma$ -<sup>32</sup>P]ATP. Autoradiograph (upper) and Coomassie staining (bottom) show phosphorylation and loading of purified RAF-KD and SnRK2s, respectively. Source data are provided as Source Data file.

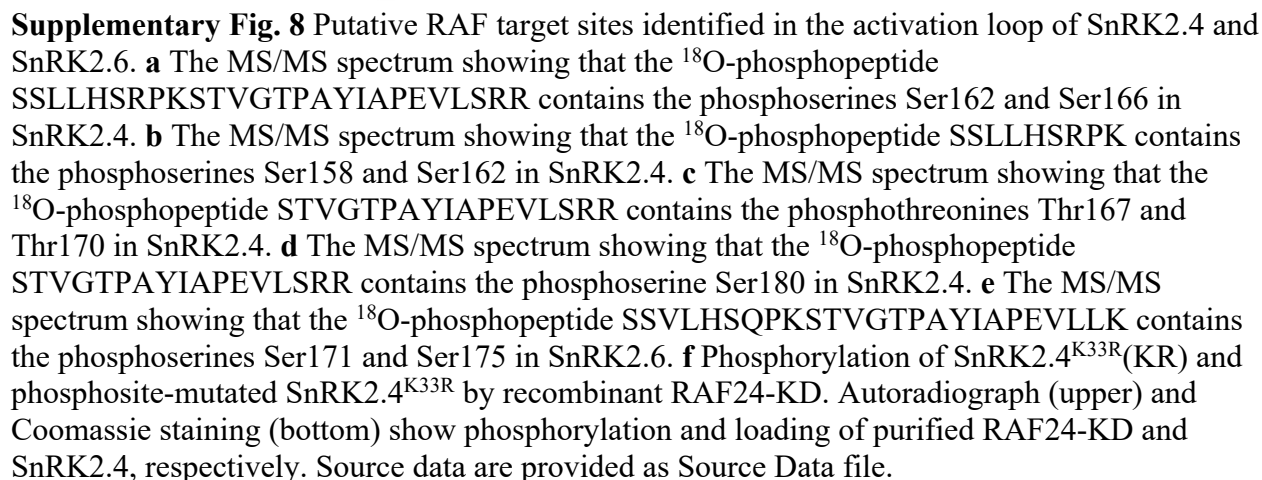

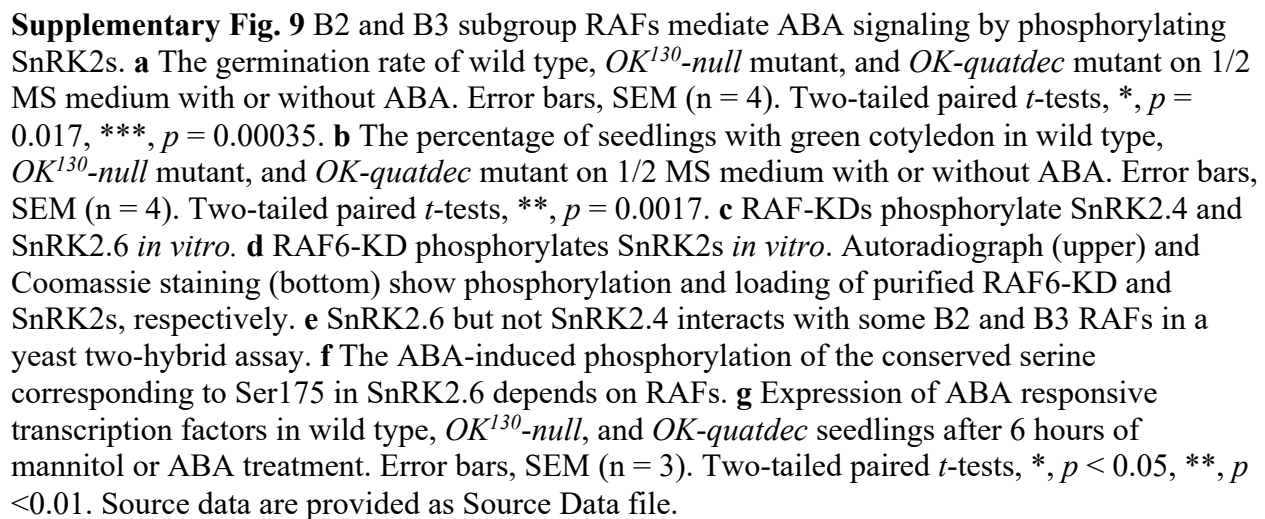

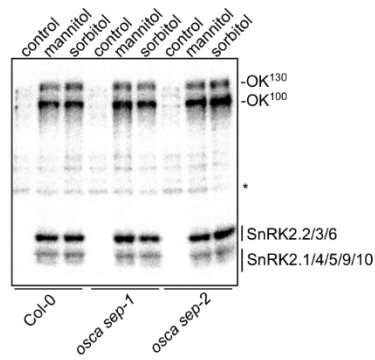

**Supplementary Fig. 10** Mutation of OSCA does not affect the RAF and SnRK2 activation. In-gel kinase assay showing the SnRK2, OK<sup>100</sup>, and OK<sup>130</sup> activities in mannitol- and sorbitol-treated wild type and *osca-sep* mutants. Image is representative of two independent experiments. Source data are provided as Source Data file.

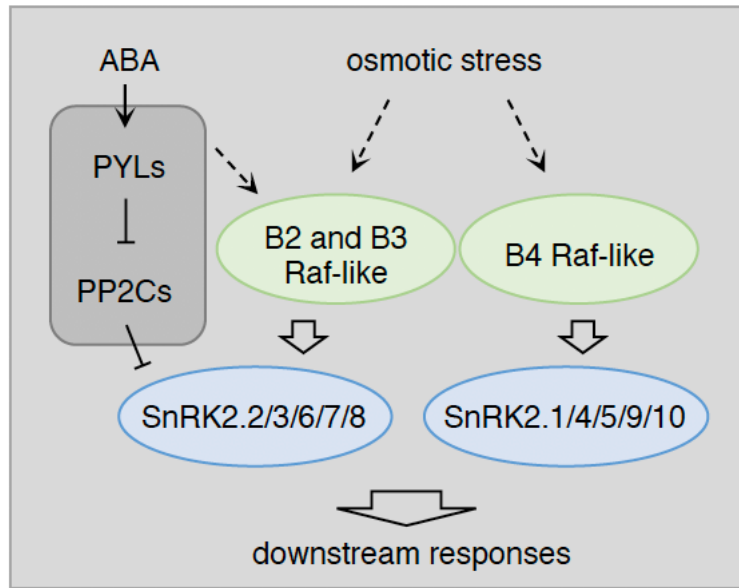

**Supplementary Fig. 11** Model showing that RAFs mediate early osmotic stress and ABA signaling by phosphorylating SnRK2s.

**Supplementary Table 1.** The guide RNAs used for genome editing and their target sequences.

| The <i>gRNAs</i> used in <i>pCambia 1300-6RAFs</i>  |                       |                 |
|-----------------------------------------------------|-----------------------|-----------------|
| name                                                | gRNA sequence         | target gene     |
| gRNA-1                                              | AGGGGTATGATAGTGCTGCT  | RAF40/AT3G24715 |
| gRNA-2                                              | GACCCTAGAGATGAGGGACT  | RAF24/AT2G35050 |
| gRNA-3                                              | AATGAGATGGAAAACCGTGG  | RAF18/AT1G16270 |
|                                                     |                       | RAF20/AT1G79570 |
| gRNA-4                                              | AGCTTTGAATCACCTGGACG  | RAF18/AT1G16270 |
|                                                     |                       | RAF20/AT1G79570 |
| gRNA-5                                              | GATGAGGATCTTGATGCTT   | RAF35/AT5G57610 |
|                                                     |                       | RAF42/AT3G46920 |
| gRNA-6                                              | TTTGGGATGGAGTATTTGCA  | RAF35/AT5G57610 |
|                                                     |                       | RAF42/AT3G46920 |
| The <i>gRNAs</i> used in <i>pCambia 2300 2RAFs</i>  |                       |                 |
| name                                                | gRNA sequence         | target gene     |
| gRNA-7                                              | AATGTGTATGGTGAGCACAG  | RAF24/AT2G35050 |
| gRNA-8                                              | AACTACACAAGAAGCTTCGCA | RAF24/AT2G35050 |
| gRNA-9                                              | ATAATCCCTAGACCAAGTGA  | RAF42/AT3G46920 |
| gRNA-10                                             | CCGGCCAATCTTTCAGCTTC  | RAF42/AT3G46920 |
| The <i>gRNAs</i> used in <i>pCambia 2300 5RAFs</i>  |                       |                 |
| name                                                | gRNA sequence         | target gene     |
| gRNA-11                                             | TGTAGTCCAGCTGCATCAGC  | RAF4/AT1G18160  |
|                                                     |                       | RAF5/AT1G73660  |
| gRNA-12                                             | G TTCCTTGTCGAATAGTCAA | RAF4/AT1G18160  |
|                                                     |                       | RAF5/AT1G73660  |
| gRNA-13                                             | CGTCTCAGTGACTGACGAAG  | RAF2/AT1G08720  |
| gRNA-14                                             | CATCGGAGGTGGTAGCCCAG  | RAF2/AT1G08720  |
| gRNA-15                                             | CAGTGTTAAGTCTGAAAGCC  | RAF11/AT1G67890 |
|                                                     |                       | RAF10/AT5G49470 |
| gRNA-16                                             | ATTGGAGAACAAATCGGGCA  | RAF11/AT1G67890 |
|                                                     |                       | RAF10/AT5G49470 |
| The <i>gRNAs</i> used in <i>pCambia 2300 11RAFs</i> |                       |                 |
| name                                                | gRNA sequence         | target gene     |
| gRNA-12                                             | G TTCCTTGTCGAATAGTCAA | RAF3/AT1G18160  |
|                                                     |                       | RAF5/AT1G73660  |
|                                                     |                       | RAF7/AT3G06620  |
| gRNA-17                                             | CAGCAGCAGTGTTATGAACA  | RAF11/AT1G67890 |
|                                                     |                       | RAF10/AT5G49470 |
| gRNA-18                                             | AAGCGAGAGAAAGTCAACGG  | RAF3/AT5G11850  |
| gRNA-19                                             | CAGAAGCTCTCTCTCCTCAT  | RAF6/AT4G24480  |
|                                                     |                       | RAF8/AT3G06630  |
| gRNA-20                                             | TCATGTGGAAGTGTCTATCA  | RAF7/AT3G06620  |
|                                                     |                       | RAF11/AT1G67890 |
|                                                     |                       | RAF10/AT5G49470 |
| gRNA-21                                             | TGGAAAGGGAATGAGCAGGA  | RAF9/AT3G06640  |
|                                                     |                       | RAF7/AT3G06620  |
| gRNA-14                                             | CATCGGAGGTGGTAGCCCAG  | RAF2/AT1G08720  |
| gRNA-22                                             | GACGGGATTGGAGACGGACA  | RAF12/AT4G23050 |
